# Supplementary material
Source: publisher figshare collection journal article supplement (https://gsapubs.figshare.com/ndownloader/files/30645774)
Supplement: Supplementary file 1 [file 30645774]

## Sheet: Parental_TTG_composition
Wt%	SiO2	TiO2	Al2O3	Fe2O3	Cr2O3	MgO	CaO	Na2O	K2O	H2O	Mol% (THERMOCALC) input	SiO2	TiO2	Al2O3	FeO	Cr2O3	MgO	CaO	Na2O	K2O	H2O	O	µg/g	Rb	Ba	Th	U	Nb	Ta	La	Ce	Sr	Nd	Zr	Sm	Eu	Gd	Dy	Er	Yb	Y	Lu
Parental TTG	70.742	0.28	15.754	2.584	0.0078	0.882	3.0258	5.048	1.432	1.576		72.33	0.22	9.49	1.99	0.003	1.34	3.31	5	0.93	5.37	0.22		53.404	470.86	5.9966	0.7838	4.1506	0.2542	22.06	40.812	369.08	15.628	138.6	2.5232	0.6586	1.6104	1.1042	0.5544	0.5158	5.78	0.0798

## Sheet: G49287
Kendrick, J., Duguet, M., and Yakymchuk, C., 2021, Diversification of Archean tonalite-trondhjemite-granodiorite suites in a mushy middle crust: Geology, https://doi.org/10.1130/G49287.1
